# Supplementary figures and images for: Identification and Functional Validation of Auxin-Responsive Tabzip Genes from Wheat Leaves in Arabidopsis
Source: MDPI journal article supplement (doi:10.3390/ijms24010756), 2023-01-01

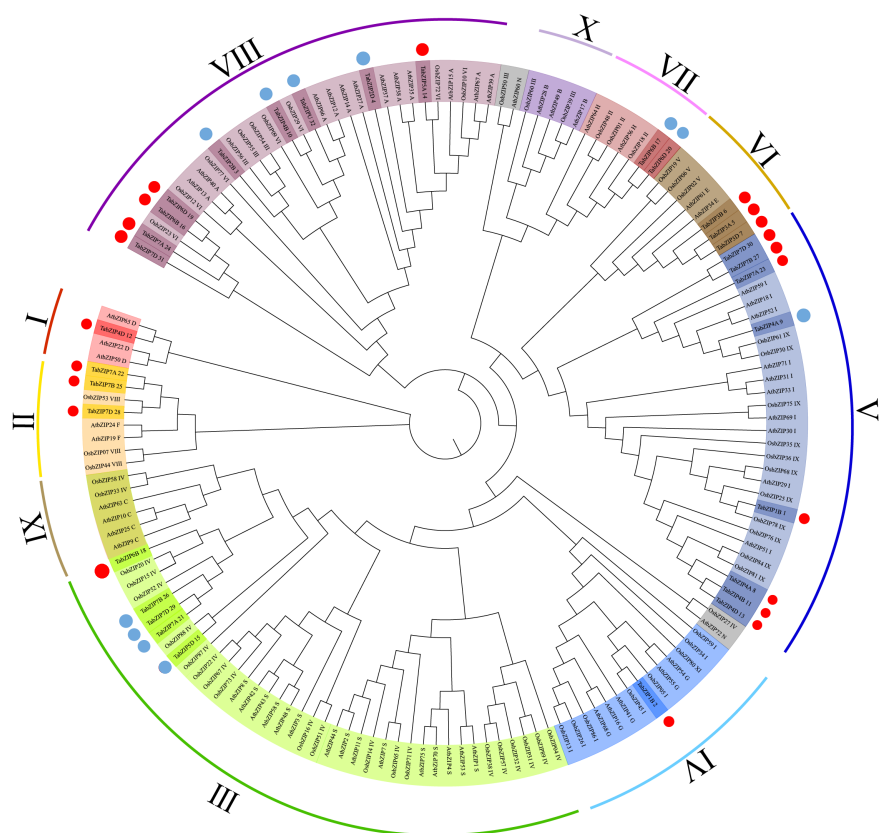

Supplement: s1 [file s1]
